# Supplementary material for: Fabrication of a composite of nanocrystalline carbonated hydroxyapatite (cHAP) with polylactic acid (PLA) and its surface topographical structuring with direct laser writing (DLW)
Source: Royal Society of Chemistry journal article supplement (doi:10.1039/c6ra11679e), 2016-01-01
Supplement: c6ra11679e1.pdf [file c6ra11679e1.pdf]

## Fabrication of composite of nanocrystalline carbonated hydroxyapatite (cHAP) with polylactic acid (PLA) and its surface topographical structuring with direct laser writing (DLW)

Supporting information - figure captions:

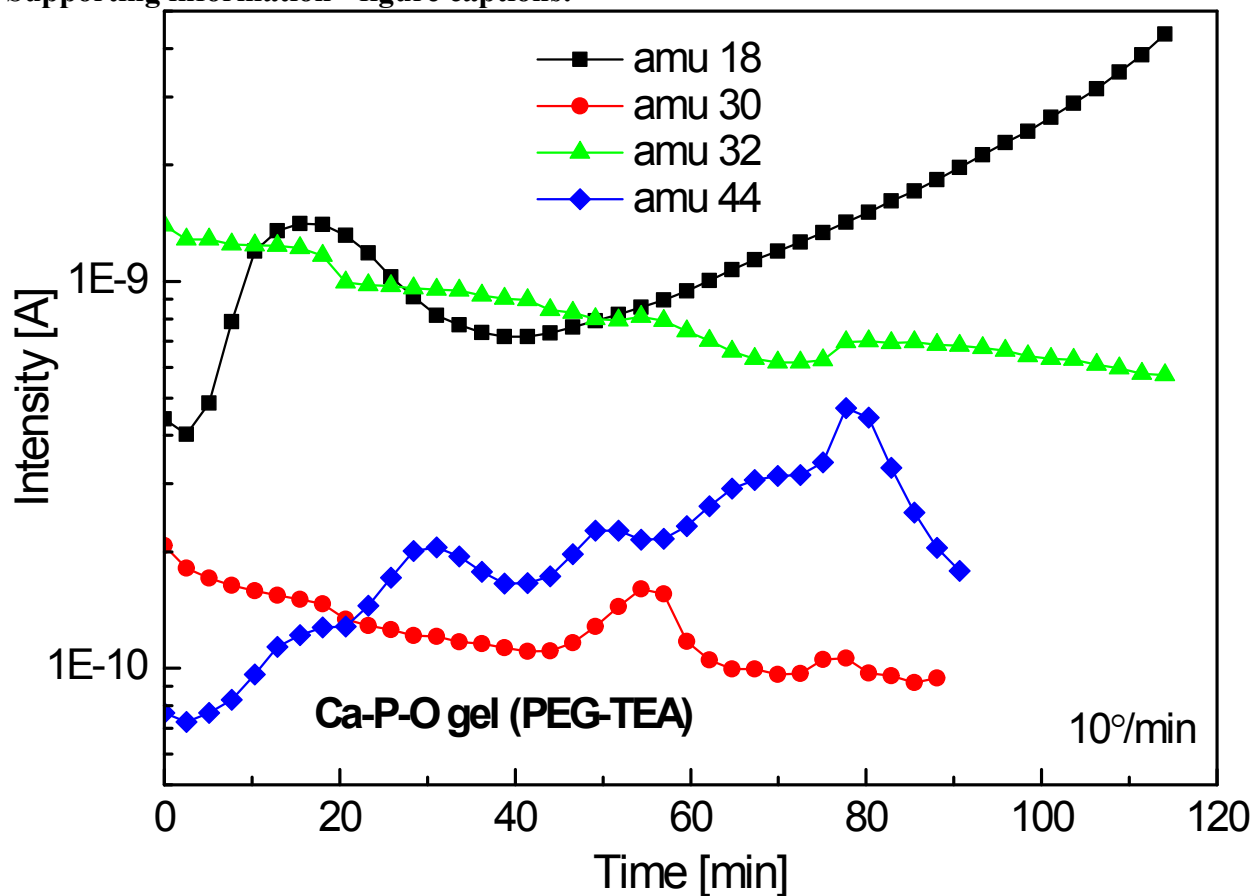

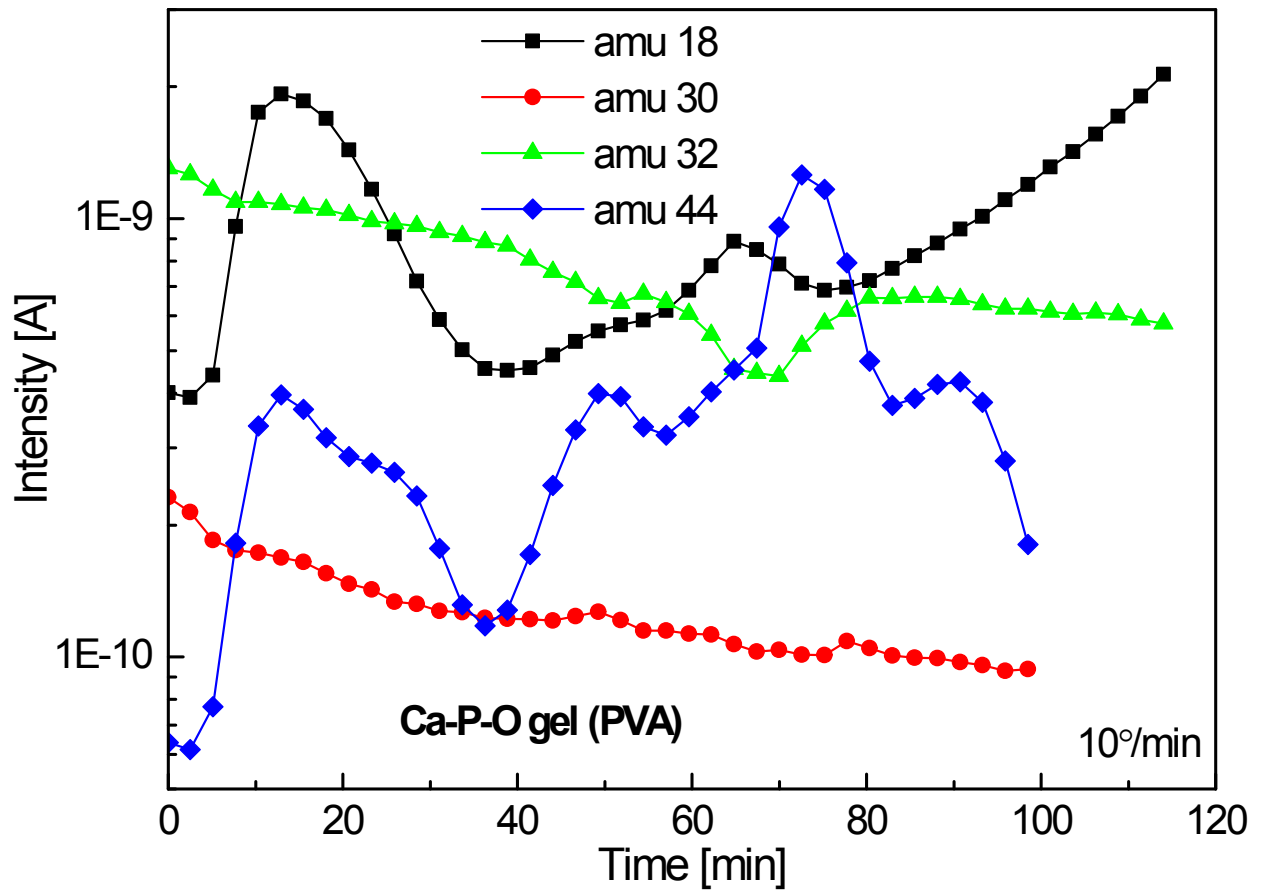

Figure S2. MS curves of Ca-P-O gel synthesized using PVA matrix.

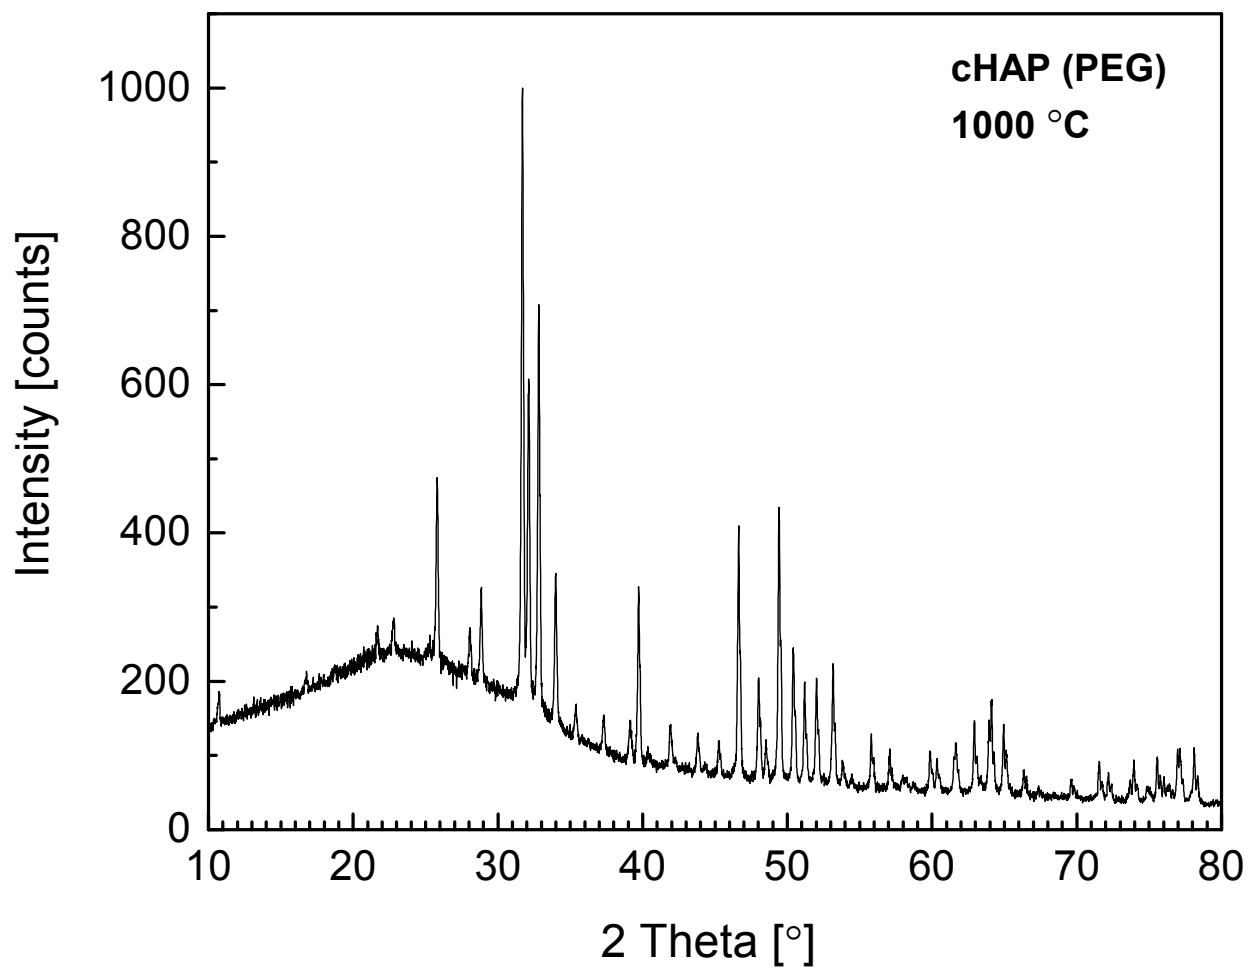

**Figure S3.** XRD diffractogram of cHAP (PEG) annealed at 1000 °C for 5 h (background increment is due to glass sample holder).

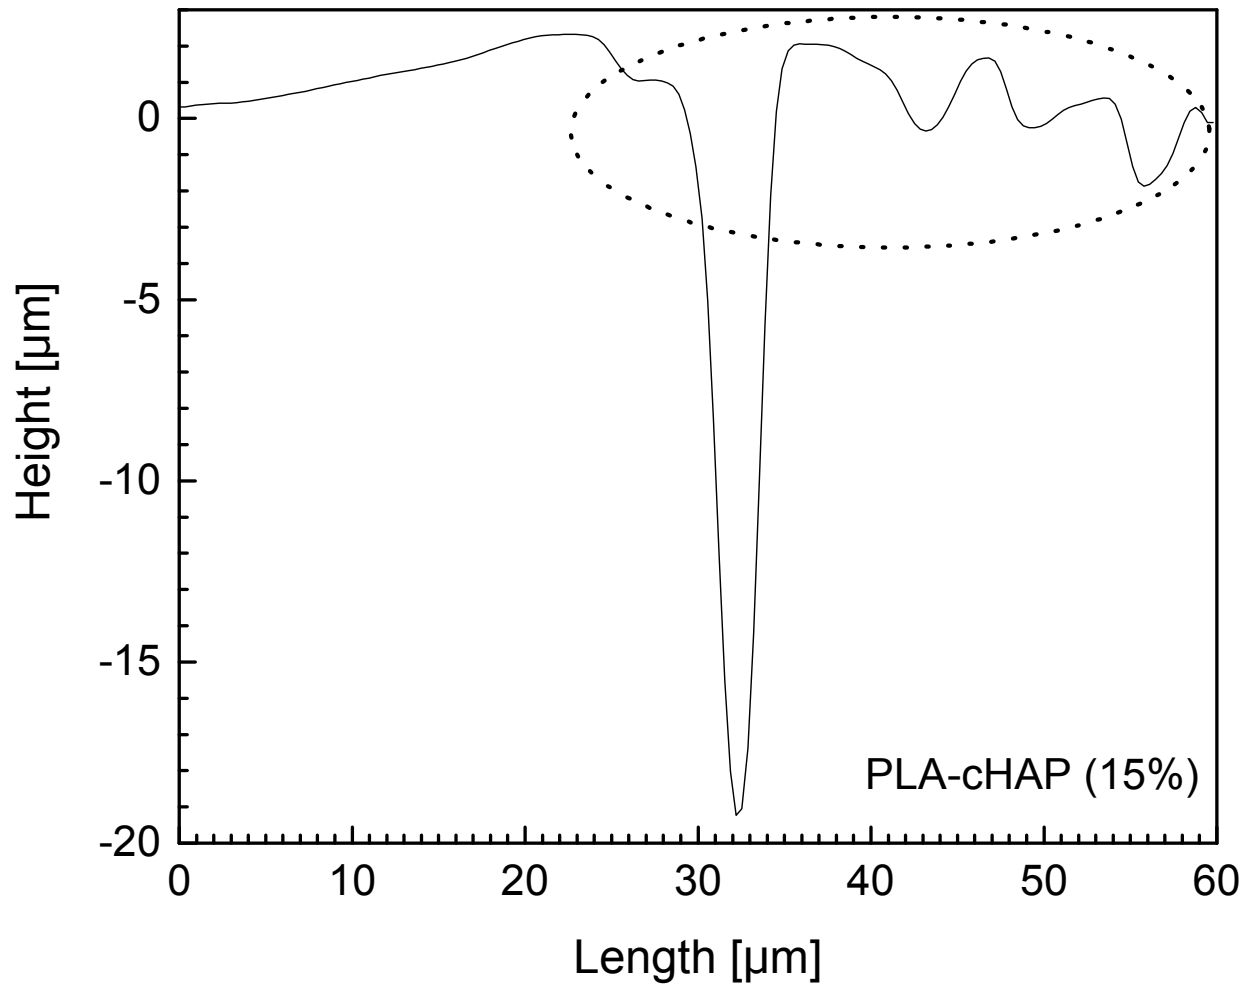

**Figure S4.** Optical profilometer height profile showing depth of the independent groove fabricated on the surface of PLA-HAP (15%) composite pellet (lines were fabricated using peak intensity of  $8.93 \text{ TW/cm}^2$  and the translation velocities of  $250 \text{ μm/s}$ ) and roughness of the damaged surface (marked as dotted circle) after the composite pellet was exposed to the electron beam (post SEM analysis).
